1 **Selection on sperm size in response to promiscuity and variation in female sperm storage organs**

2 Emily R. A. Cramer\*<sup>1</sup>, Zelealem B. Yilma<sup>2</sup>, Jan T. Lifjeld<sup>1</sup>

3 <sup>1</sup>Sex and Evolution Research Group, Natural History Museum, University of Oslo

4 <sup>2</sup>Carnegie Mellon University in Qatar

5 \*corresponding author email [becky.cramer@nhm.uio.no](mailto:becky.cramer@nhm.uio.no), OrcID 0000-0002-1443-9255

6

7 **Acknowledgements**

8 Emma Whittington, Thore Koppetsch, Arild Johnsen, and others in SERG provided useful discussion.

9 This study was funded by the Norwegian Research Council, project number 301592.

10

11 **Author contributions:** ERAC and JTL conceived of the study. All authors designed the simulation.

12 ERAC coded and analyzed simulations. ZBY created the analytical model. All authors contributed to

13 interpreting the results. ERAC drafted the manuscript and all authors contributed to revising the text.

14

15 **Conflicts of Interest:** The authors declare they have no conflicts of interest.

16

17 **Ethical approval:** Not applicable

18

19

20

21 **Abstract.** – Sperm cells are exceptionally morphologically diverse across taxa. However, morphology  
22 can be quite uniform within species, particularly for species where females copulate with many  
23 males per reproductive bout. Strong sexual selection in these promiscuous species is widely  
24 hypothesized to reduce intraspecific sperm variation. Conversely, we hypothesize that intraspecific  
25 sperm size variation may be maintained by high among-female variation in the size of sperm storage  
26 organs, assuming that paternity success improves when sperm are compatible in size with the sperm  
27 storage organ. We use individual-based simulations and an analytical model to evaluate how  
28 selection on sperm size depends on promiscuity level and variation in sperm storage organ size  
29 (hereafter, female preference variation). Simulated species with high promiscuity showed stabilizing  
30 selection on sperm when female preference variation was low, and disruptive selection when female  
31 preference variation was high, consistent with the analytical model results. With low promiscuity (2-3  
32 mates per female), selection on sperm was stabilizing for all levels of female preference variation in  
33 the simulations, contrasting with the analytical model. Promiscuity level, or mate sampling, thus has  
34 a strong impact on the selection resulting from female preferences. Further, for species with low  
35 promiscuity, disruptive selection on male traits will occur under more limited circumstances than  
36 many previous models suggest. Variation in female sperm storage organs likely has strong  
37 implications for intraspecific sperm variation in highly promiscuous species, but likely does not  
38 explain differences in intraspecific sperm variation for less promiscuous taxa.

39 **Key words:** sperm morphology, sperm storage, mate choice, cryptic female choice, sperm length

## 40 **Introduction**

41 Sperm cells have exceptional morphological diversity across species (Pitnick *et al.*, 2009). This  
42 diversity is partly driven by fertilization environment (internal vs. external; Kahrl *et al.*, 2021b), and is  
43 also hypothesized to be driven by sexual selection, which can arise when a female copulates with  
44 multiple males in a single reproductive bout. With such female promiscuity, sperm from different

45 males may compete to fertilize the egg(s) (Parker, 1970) and/or the female may exert cryptic choice  
46 for particular sperm or male characteristics (Eberhard, 1996). How (and whether) such post-  
47 copulatory sexual selection processes result in selection on sperm morphology requires more study  
48 in most study systems (Lüpold & Pitnick, 2018), but two patterns are quite robust across studies.  
49 Specifically, sperm cell morphology co-evolves with the morphology of female sperm storage organs  
50 both in comparative studies (Dybas & Dybas 1981; Briskie & Montgomerie 1992; Higginson *et al.*  
51 2012; reviewed in Lüpold & Pitnick 2018) and in experimental evolution studies (e.g., Hosken *et al.*  
52 2001; Miller & Pitnick 2002). These studies suggest that sperm evolve to “fit” sperm storage organs  
53 (and/or vice versa) in internally fertilizing species. In addition, among-male variation in sperm length  
54 is lower in more promiscuous taxa, suggesting stronger selection for an optimal sperm phenotype  
55 (sperm total length: birds, Calhim *et al.* 2007; Lifjeld *et al.* 2010; rodents, Varea-Sánchez *et al.* 2014;  
56 and social insects, Fitzpatrick & Baer 2011; flagellum length: sharks, Rowley *et al.* 2019). In this paper,  
57 we use simulations and an analytical model to explore how promiscuity level and among-female  
58 variability in the sperm storage organs interact in driving selection on sperm.

59 Female sperm storage organs represent an important selective environment for sperm cells  
60 in many species. Correlations between individual males’ proportion of sperm stored and proportion  
61 of eggs fertilized can be high, reinforcing the idea that successful interaction with the female is  
62 important (Bretman *et al.* 2009; Manier *et al.* 2010; Hemmings & Birkhead 2017; though note that  
63 females do not necessarily use stored sperm from all males, e.g. Simmons & Beveridge 2010; Turnell  
64 & Shaw 2015). Many factors may impact the successful storage of sperm, including motility as the  
65 sperm enter the sperm storage organ (Mendonca *et al.*, 2019), mating order (Hellriegel & Bernasconi,  
66 2000; Manier *et al.*, 2010; Hemmings & Birkhead, 2017), complex biochemical interactions among  
67 ejaculates and with the female (den Boer *et al.*, 2010), and genetic compatibility of the male and  
68 female (Simmons *et al.* 2006; Gasparini & Pilastro 2011; though genetic compatibility may be  
69 assessed in the male rather than directly from the sperm, Løvlie *et al.* 2013). Here we focus on the  
70 potential impact of morphological compatibility between the sperm cell and the sperm storage

71 organ, which is suggested by the co-evolution of morphology of sperm and sperm storage organs  
72 across taxa (reviewed in Lüpold & Pitnick 2018). There are notable exceptions to the idea of  
73 morphological compatibility; for example, García-González and Simmons (2007) find stronger  
74 selection for short sperm in females with larger sperm storage organs in the dung beetle  
75 *Onthophagus taurus*, so the mechanism we outline here will not be applicable in all systems.

76 In addition to being important selective environments for sperm, female sperm storage  
77 organs likely vary among individuals, following several lines of evidence. First, since genetic variation  
78 is a pre-requisite for evolution, the fact that sperm storage organ morphology evolves suggests that  
79 it varies (Jennions & Petrie, 1997). Genetic variation in sperm storage organ morphology has also  
80 been directly documented (Miller & Pitnick, 2002; Lüpold *et al.*, 2013). In addition, environmental  
81 and social conditions during development can affect sperm storage organ morphology (Amitin &  
82 Pitnick, 2007; Berger *et al.*, 2011; Farrow *et al.*, 2022). Within-female variation is also known, for  
83 example, in birds, where each female has hundreds of sperm storage tubules, whose lengths vary in  
84 a gradient across the utero-vaginal junction (where these structures occur), and with stage of the  
85 egg-laying cycle (Briskie, 1996).

86 Thus we hypothesize that females vary in their sperm storage organ morphology, and that  
87 the morphological fit between these organs and sperm cells is a mechanism of cryptic female choice,  
88 because it biases storage success (and therefore fertilization success) towards well-fitted sperm. We  
89 model a scenario where all females have the same preference function, whereby the sperm that best  
90 fit their sperm storage organs is more likely to fertilize their eggs. However, females' preferences  
91 (i.e., the sperm trait values that best fit individual females) vary because the preference function is  
92 self-referential against a variable morphological trait. This hypothesis is supported by Hemmings *et*  
93 *al.* (2016), who allowed females to copulate with one male and then compared the morphology of  
94 ejaculated cells and of sperm cells that reached the ovum after sperm storage. Re-analysis of their  
95 data (see Supplemental file) indicates that the mean sperm length at the egg differed significantly

96 from the mean ejaculated sperm in 10 of 27 females (Table S1). Sperm at the egg was longer than  
97 ejaculated sperm for half the females and shorter in the other half, consistent with variable female  
98 preferences for sperm size. Furthermore, under this hypothesis, we can expect that males may have  
99 different relative fertilization success when they copulate with different females. Several studies do  
100 indeed find that the combination of male and female identities (or genetic lines) has a strong impact  
101 on fertilization success (Wilson *et al.*, 1997; Clark, 2002; Birkhead *et al.*, 2004; Bjork *et al.*, 2007;  
102 Simmons *et al.*, 2014; Reinhart *et al.*, 2015) (although we note that a combinatorial effect of male  
103 and female may also arise due to other processes, for example, variation in copulation duration, Eady  
104 and Brown 2017, or sperm swimming speed, Urbach *et al.* 2005; Cramer *et al.* 2014; Cramer *et al.*  
105 2016).

106           Because we view the fit of sperm and sperm storage organ as a mechanism of cryptic female  
107 choice (Lüpold & Pitnick, 2018), we can expect some parallels between this process and mate choice.  
108 However, to our knowledge, no theoretical work on mate choice models the conditions most  
109 relevant for sperm-female interactions. Specifically, most mate choice models assume that females  
110 copulate with a single male in the population, while empirical data show that females often copulate  
111 with multiple males, who then share paternity of their offspring (e.g., Gage, 1994; Simmons *et al.*,  
112 2007; Simmons & Beveridge, 2010; Turnell & Shaw, 2015; Brouwer & Griffith, 2019; Kahrl *et al.*,  
113 2021a). In addition, we assume that females copulate with fewer males than they assess during mate  
114 choice, implying that females sample the sperm of relatively few males. The number of sampled  
115 partners is known to impact resulting selection strength (Janetos, 1980; Gomulkiewicz, 1991; Muniz  
116 & Machado, 2018). Finally, in species where eggs are ovulated in batches, female sperm storage  
117 organs have already gathered all the sperm cells that potentially can fertilize the eggs, making cryptic  
118 female choice best represented by a simultaneous assessment model. Under a simultaneous  
119 assessment strategy, the female evaluates all individuals in a set of potential males before choosing  
120 among them. Simultaneous assessment strategies can give different results from other assessment  
121 strategies (Janetos, 1980; Jennions & Petrie, 1997; Muniz & Machado, 2018), and to the best of our

122 knowledge, continuous variation in female preferences has not been modeled with simultaneous  
123 assessment with a reasonable number of copulation partners (for an internally fertilizing species).  
124 See Millan *et al.* (2020) for relevant work with a different assessment model, and Van Doorn *et al.*,  
125 (2001) and van Doorn & Weissing (2002) for models relevant for broad-cast spawners with high mate  
126 sampling. Further work is thus needed to understand how variation in female sperm storage organs  
127 impacts selection on sperm.

128           Here, we use individual-based simulations and an analytical model to investigate how  
129 among-female variation in sperm storage organs affects the resulting selective pressure on sperm,  
130 and we assess whether this relationship depends on the level of female promiscuity, ie., number of  
131 copulation partners. We predict that selection will be stronger with higher promiscuity (Janetos,  
132 1980; Gomulkiewicz, 1991; Muniz & Machado, 2018). We further hypothesize that where female  
133 preference is less variable than sperm, there will be stronger stabilizing selection on sperm as female  
134 trait variation is further reduced. Conversely, where female preference is more variable than sperm,  
135 we predict that there will be stronger disruptive selection on sperm as variation in the female trait  
136 increases (Jennions & Petrie, 2000; Van Doorn *et al.*, 2001; van Doorn & Weissing, 2002; Weissing *et*  
137 *al.*, 2011).

138

## 139 **Methods**

### 140 *Assumptions*

141 We assume a closed population with an equal sex ratio, where copulations occur randomly with  
142 respect to the sperm and preference traits. All eggs are fertilized, so that preferences are selectively  
143 neutral for females. This assumption is similar to the “last-chance” option of Janetos (1980), whereby  
144 females accept any male rather than not mate.

### 145 *Simulation procedure*

146 For each iteration of the simulation, we created a population of 200 individuals of each sex, breeding  
147 for one season. Each female produced one set of 25 offspring. This value was chosen to enable us to  
148 exploring a relatively high number of copulation partners, while still allowing a substantial probability  
149 for each partner to sire offspring. Males are assigned a sperm trait from a normal distribution with  
150 mean 0 and SD = 1. Females are assigned a preference (i.e., sperm storage organ size) on the same  
151 scale, such that the fit between sperm and preference is best when the trait values are equal. We  
152 varied population-level SD in female preference (values of 0.5, 1, 1.5, and 2; comparable to the  
153 variation explored by Millan *et al.* 2020), but, for simplicity, the population mean preference was  
154 always equal to the sperm preference mean.

155 All individuals copulated with members of the opposite sex 1, 2, 3, 5, 10, or 25 times.  
156 Detailed information on number of copulation partners is poorly known for many species, and is  
157 often inferred from genotyping stored sperm in the female or determining paternity of offspring.  
158 Empirical data thus provides a minimum estimate of number of individual partners (Cramer *et al.*,  
159 2020a). For many species, an average number of copulation partners less than 5 appears realistic  
160 (Gage, 1994; Brommer *et al.*, 2007, 2010; Simmons *et al.*, 2007; Simmons & Beveridge, 2010; Turnell  
161 & Shaw, 2015; Cramer *et al.*, 2020a; Kahrl *et al.*, 2021a), though in eusocial insects the average can  
162 be over 50 (Tarpay *et al.*, 2004). The values we chose to investigate were also informed by the  
163 expectation that selection strength should asymptote with > about 10 copulation partners  
164 (Gomulkiewicz, 1991; Muniz & Machado, 2018). We include 1 copulation partner to confirm the  
165 expectation of no selection on sperm under this condition. Copulation partners were assigned  
166 randomly by shuffling the list of individual identities for each copulation event. This could result in  
167 a pair of individuals copulating with each other more than once. Since that presumably occurs in  
168 nature and represents a limited proportion of copulations, we do not control for such repeated  
169 copulations in statistical analysis.

170 Following copulation, the fertilizing sperm for each egg was determined using R's *sample*  
171 function. Weighting the *sample* function requires positive, non-zero values; it then sums all  
172 individuals' weight values, and the probability that an individual is drawn is proportional to its  
173 contribution to the sum of the weight values across all individuals. Thus, a male's success depends on  
174 his relative weight (i.e., fit) for the female preference compared to the other copulation partners, not  
175 his absolute fit. To calculate absolute fit, we modeled the fit quality as a Gaussian function which  
176 attains its maximum when the male's trait value,  $y$ , matches the female's preference,  $x$ . The  
177 parameter  $\sigma_U$ , akin to standard deviation, controls the strength of the preference (sensu Millan *et*  
178 *al.*, 2020). For the sake of simplicity, we use a value of  $\sigma_U=1$  in all simulations. We therefore  
179 calculated the fit score between the sperm size,  $y$ , and the female preference,  $x$ , as:

$$180 \quad e^{\frac{-(x-y)^2}{2\sigma_U^2}} \quad \text{Eq 1}$$

181 This equation represents the preference function used by all females. After calculating the fit for all  
182 copulation partners, we assigned fertilization by drawing male identities from a list of the individual  
183 female's copulation partners, weighted according to the fit scores.

184 After counting all offspring sired for each male, the selection gradient on the sperm trait was  
185 calculated. To do so, reproductive success was standardized by dividing by the population mean  
186 reproductive success. Sperm trait values were standardized to have a population mean of 0 and  
187 standard deviation of 1 (following Lande & Arnold, 1983). Standardized reproductive success was  
188 then regressed on the standardized sperm trait, including both a linear and a quadratic term (Lande  
189 & Arnold, 1983). Negative values of the quadratic term indicate stabilizing selection, and positive  
190 values indicate disruptive selection. We extracted the quadratic selection gradient parameter from  
191 each replicate population.

192 After performing 1000 replicate populations with the same set of conditions, we compared  
193 how the quadratic selection gradient changed with the treatments (variation in female preference



194 and number of copulation partners). To facilitate interpretation, we treat each predictor as  
195 categorical rather than continuous. Following the logic outlined in White *et al.* (2014), we rely on  
196 effect size estimates rather than p-values in interpreting our results (since simulations can make  
197 sample size be arbitrarily high and p-values correspondingly low). Following Richardson (2011), we  
198 use  $\eta^2$  as the effect size estimate, with values of 0.1, 0.25, and 0.5 considered small, medium, and  
199 large, respectively. These were calculated via sjstats (Lüdecke, 2021). We further directly calculated  
200 the 95% confidence limits on each simulation condition, as the 2.5% and 97.5% quantiles of the  
201 observed values.

202 All simulations and statistics were performed in R using base functions and the tidyverse  
203 package (Wickham *et al.*, 2019). We ran a modified set of simulations to assess the impact of sharing  
204 paternity (Table S2) and of having larger clutch size relative to copulation partner count in an open  
205 population (Table S3). Overall patterns were highly similar.

#### 206 *Analytical model*

207 Among-female variation in female preference had strong impacts on the shape of selection (see  
208 Results), which depended also on the number of copulation partners. To better understand when  
209 disruptive or stabilizing selection should be expected when the female could sample all males, we  
210 used an analytical model that parallels the simulation. Similar to the simulations, among-female  
211 variation in preference is modeled as normally distributed with mean of 0 and standard deviation  $\sigma_F$ .  
212 Among-male variation in sperm is modeled as normally distributed with mean 0 and standard  
213 deviation  $\sigma_M$ . The probability density function of the female preference across all females is then

$$214 \quad F(x) = \frac{1}{\sqrt{2\pi}\sigma_F} e^{-x^2/2\sigma_F^2} \quad (\text{Eq. 2})$$

215 and the probability density function for the sperm trait across all males is

$$216 \quad M(y) = \frac{1}{\sqrt{2\pi}\sigma_M} e^{-y^2/2\sigma_M^2} \quad (\text{Eq. 3})$$

217 Denoting the preference function as  $U(x,y)$ , the probability distribution function of fertilization  
218 success for all males with trait value  $y$ , given a female with preference  $x$ , can be expressed as

$$219 \quad S(y | X = x) = \frac{M(y)U(x,y)}{\int_{-\infty}^{\infty} M(y)U(x,y) dy} = \frac{M(y)U(x,y)}{V(x)} \quad (\text{Eq. 4})$$

220

221 Intuitively, the denominator,  $V(x)$ , can be thought of as the total of the female's fit scores across all  
 222 males in the population, and the numerator expresses the contribution of males with trait value  $y$  to  
 223 the total of the female's fit scores. This is analogous to the *sample* function if all males were  
 224 sampled.

225 Fertilization success for all males with trait value  $y$  can be calculated as the integral of their  
 226 fertilization success across all females:

$$227 \quad S(y) = \int_{-\infty}^{\infty} F(x)S(y | X = x) dx = M(y) \int_{-\infty}^{\infty} \frac{F(x)U(x,y)}{V(x)} dx = M(y)R(y) \quad (\text{Eq. 5})$$

228 where

$$229 \quad R(y) = \int_{-\infty}^{\infty} \frac{F(x)U(x,y)}{V(x)} dx = \frac{S(y)}{M(y)} \quad (\text{Eq. 6})$$

230 gives the fertilization success of males with value  $y$ , relative to their representation in the population.

231 In the simulations, we assumed that  $U(x,y)$  was given by Eq. 1. Under this condition, we can  
 232 explicitly calculate the function  $R(y)$ . By substituting Eq 1- 3 into the more general form equations 4-  
 233 6, we have

$$234 \quad V(x) = \frac{1}{\sqrt{2\pi}\sqrt{\sigma_M^2 + \sigma_U^2}} e^{-\frac{x^2}{2(\sigma_M^2 + \sigma_U^2)}} \quad (\text{Eq 7})$$

$$235 \quad S(y | X = x) = \frac{\sqrt{\frac{\sigma_M^2 + \sigma_U^2}{2\pi\sigma_M^2\sigma_U^2}}}{\sqrt{\frac{\sigma_M^2 + \sigma_U^2}{2\pi\sigma_M^2\sigma_U^2}}} e^{\frac{x^2}{2(\sigma_M^2 + \sigma_U^2)} - \frac{y^2}{2\sigma_M^2} - \frac{(x-y)^2}{2\sigma_U^2}} \quad (\text{Eq. 8})$$

$$236 \quad R(y) = \frac{\sigma_M \sqrt{\frac{1}{\sigma_M^2} + \frac{1}{\sigma_U^2}}}{\sigma_F \sqrt{\frac{1}{\sigma_F^2} - \frac{1}{\sigma_M^2 + \sigma_U^2} + \frac{1}{\sigma_U^2}}} e^{-\frac{y^2(-\sigma_F^2 + \sigma_M^2 + \sigma_U^2)}{2(\sigma_F^2\sigma_M^2 + \sigma_M^2\sigma_U^2 + \sigma_U^4)}} \quad (\text{Eq. 9})$$

237 We can re-write Eq. 9 as follows:

$$238 \quad = \frac{\sigma_M^2 + \sigma_U^2}{\sqrt{\sigma_F^2\sigma_M^2 + \sigma_M^2\sigma_U^2 + \sigma_U^4}} e^{-\frac{y^2(-\sigma_F^2 + \sigma_M^2 + \sigma_U^2)}{2(\sigma_F^2\sigma_M^2 + \sigma_M^2\sigma_U^2 + \sigma_U^4)}} \quad (\text{Eq 10})$$

$$239 \quad = \frac{\sigma_M^2 + \sigma_U^2}{\sqrt{\sigma_M^2(\sigma_F^2 - \sigma_M^2 - \sigma_U^2) + (\sigma_M^2 + \sigma_U^2)^2}} e^{-\frac{y^2(-\sigma_F^2 + \sigma_M^2 + \sigma_U^2)}{2(\sigma_F^2\sigma_M^2 + \sigma_M^2\sigma_U^2 + \sigma_U^4)}} \quad (\text{Eq 11})$$

240 This model is similar to models used by several authors (e.g., Lande, 1981; Dieckmann &  
241 Doebeli, 1999), but those authors did not explicitly describe conditions predicting stabilizing and  
242 disruptive selection.

243

## 244 Results

### 245 Simulations

246 The value of the quadratic selection gradient term depended on among-female variation in  
247 preference ( $F_{3,27972} = 74073$ ,  $\eta^2 = 0.54$ ), number of copulation partners ( $F_{6,27972} = 11557$ ,  $\eta^2 = 0.17$ ), and  
248 the interaction between the two variables ( $F_{18,27972} = 5169$ ,  $\eta^2 = 0.23$ ; Fig. 1, Fig. 2). Quadratic  
249 selection estimates changed dramatically with variation in female preference when the number of  
250 copulation partners was high. However, when females copulated only twice, stabilizing selection was  
251 only slightly weakened by higher variation in female preference (Table 1). There was no selection on  
252 sperm when the female copulated with only one male (Table 1, Fig 2). Patterns were similar in the  
253 additional simulation conditions tested (e.g., larger number of offspring per female; see  
254 supplementary information).

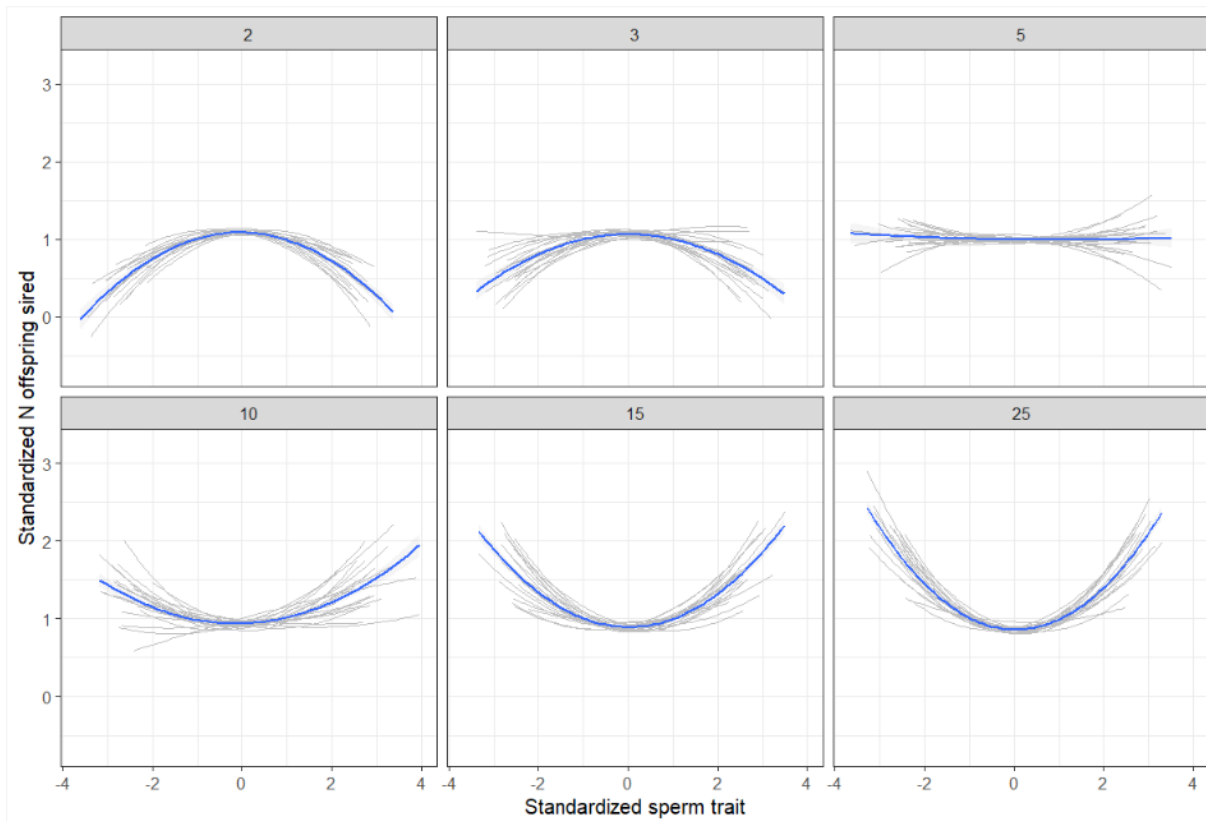

255

256 **Figure 1.** Examples of selection gradients on the sperm trait for 20 randomly selected populations  
257 with the SD for among-female variation in preference = 2. Each panel shows a different level of  
258 number of copulation partners. The male trait had a standard deviation of 1 in all treatments. Grey  
259 lines show 20 randomly selected individual populations and the blue line shows the overall pattern.

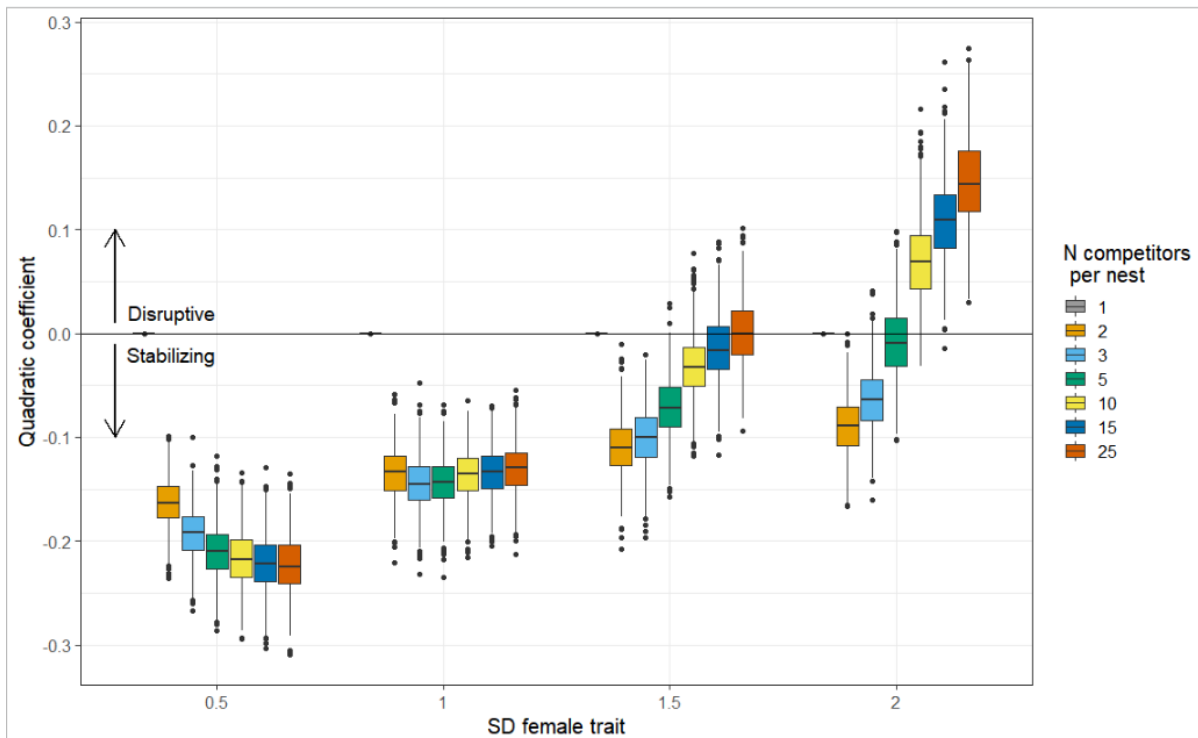

260

261 **Figure 2.** Values of the quadratic selection gradient for all simulation conditions. Colors indicate the  
 262 number of copulation partners. A value of 0 (heavy horizontal line) indicates no quadratic selection;  
 263 negative values indicate stabilizing selection; and positive values indicate disruptive selection. Results  
 264 include 1000 replicates per simulation condition.

265

Table 1. Median and 95% quantile limits on the quadratic term from selection gradients

| N copulation partners | Among-female SD in preference |                      |                      |                      |
|-----------------------|-------------------------------|----------------------|----------------------|----------------------|
|                       | 0.5                           | 1                    | 1.5                  | 2                    |
| 1                     | 0.00 (-0.00, 0.00)            | 0.00 (-0.00, 0.00)   | 0.00 (-0.00, 0.00)   | 0.00 (-0.00, 0.00)   |
| 2                     | -0.16 (-0.21, -0.12)          | -0.13 (-0.18, -0.09) | -0.11 (-0.16, -0.06) | -0.09 (-0.14, -0.03) |
| 3                     | -0.19 (-0.24, -0.14)          | -0.15 (-0.20, -0.10) | -0.10 (-0.15, -0.05) | -0.06 (-0.12, 0.00)  |
| 5                     | -0.21 (-0.26, -0.16)          | -0.14 (-0.19, -0.10) | -0.07 (-0.13, -0.02) | -0.01 (-0.07, 0.06)  |
| 10                    | -0.22 (-0.27, -0.17)          | -0.14 (-0.18, -0.09) | -0.03 (-0.09, 0.03)  | 0.07 (-0.00, 0.15)   |
| 15                    | -0.22 (-0.28, -0.17)          | -0.13 (-0.18, -0.09) | -0.02 (-0.07, 0.05)  | 0.11 (0.03, 0.19)    |
| 25                    | -0.22 (-0.28, -0.17)          | -0.13 (-0.18, -0.09) | -0.00 (-0.05, 0.06)  | 0.14 (0.07, 0.23)    |

266

267 With female preference SD 0.5, there was stabilizing selection on sperm (negative quadratic selection  
 268 coefficients, with 95% quantiles not overlapping 0), and the median strength of stabilizing selection

269 increased with the number of copulation partners between 2 and 5, but did not increase between 5  
270 and 25 (Table 1, Figure 2). With female preference SD 1, i.e., equal to male trait SD, selection on  
271 sperm was again stabilizing, but here there was little variation depending on number of copulation  
272 partners. When the SD of the female preference was 1.5, selection was stabilizing with 2, 3, or 5  
273 copulation partners, and there was no selection with 10, 15 or 25 copulation partners (95% quantiles  
274 include 0). When the SD of the female preference was 2, selection was stabilizing with 2 copulation  
275 partners; there was no selection with 3, 5, or 10 partners, and there was disruptive selection with 15  
276 or 25 partners (95% quantiles not overlapping 0, positive quadratic selection coefficients). The  
277 impact of increasing the number of copulation partners appeared to asymptote here, as the  
278 difference in median disruptive selection between 5 and 15 partners was 0.1, while the difference in  
279 median disruptive selection between 15 and 25 partners was only 0.03 (Table 1).

## 280 *Analytical model*

281 From Eq 11, we see that the shape and intercept of  $R(y)$  is determined by the expression  
282  $-\sigma_F^2 + \sigma_M^2 + \sigma_U^2$ . In particular, if  $\sigma_F^2 < \sigma_M^2 + \sigma_U^2$ ,  $R(y)$  is bell-shaped and has  $R(0) > 1$  as its  
283 maximum value, indicating that males with average trait values gain greater fertilization success than  
284 would be expected given their frequency in the population. This implies stabilizing selection. If  $\sigma_F^2 >$   
285  $\sigma_M^2 + \sigma_U^2$ ,  $R(y)$  is U-shaped and  $R(0) < 1$ , indicating that males with average trait values gain less  
286 fertilization success than expected and implying disruptive selection. No selection is expected where  
287  $\sigma_F^2 = \sigma_M^2 + \sigma_U^2$  as this results in the constant function  $R(y) = 1$ . We evaluated whether this result  
288 agreed with model results by arbitrarily choosing several sets of values for the three variances that  
289 should give no quadratic selection (see supplementary materials, Table S4).

290

## 291 **Discussion**

292 Stabilizing selection on the sperm trait when there is less variation in female preference than  
293 in sperm is intuitive: all females share a preference for sperm with a phenotype close to the male

294 population mean. Disruptive selection when female preference is more variable than sperm is  
295 similarly intuitive: many females have preferences outside the sperm trait distribution, thus the most  
296 extreme males in the population obtain high fertilization success after copulating with a matching  
297 female (Van Doorn *et al.*, 2001; van Doorn & Weissing, 2002; Millan *et al.*, 2020). Our analytical  
298 model indicates that the change from stabilizing to disruptive selection should occur when the  
299 among-female preference variance is greater than the sum of the among-male variance in sperm  
300 traits and the variance parameter in the female preference function (Eq 1, which we do not vary in  
301 this simulation). Our simulation results, however, show stabilizing selection under more conditions  
302 than expected, also compared to previous models where females sampled a large subset of males  
303 (Millan *et al.*, 2020). Specifically, when the number of copulation partners is low, stabilizing selection  
304 can occur even with high among-female variation in preference. We suggest that this stabilizing  
305 selection occurs because males with relatively extreme sperm values are relatively unlikely to  
306 copulate with females with a matching preference, and their fertilization advantage when they do  
307 achieve these matching copulations is insufficient to offset the rarity of the copulations. The  
308 importance of sampling number is also evident in the empirical literature, where mating preferences  
309 are expressed more strongly in studies where individuals can choose among two mating options,  
310 compared to studies where individuals have a single option and can mate or not (Dougherty &  
311 Shuker, 2015).

### 312 *Implications for sperm evolution*

313 This study shows that variation in cryptic female preferences and variation in number of  
314 copulation partners each can have a strong impact on the strength, or even shape, of selection on  
315 sperm morphology. Perhaps surprisingly, there are conditions where number of copulation partners  
316 does not impact the strength of selection (i.e., where sperm and preference variation are equal), and  
317 there are conditions where no selection on sperm is expected even when there are a large number of  
318 copulations. It is difficult to know which combination of variables is likely to be most biologically

319 relevant, since variation in female genital morphology is under-studied relative to male genital traits  
320 (Ah-King *et al.*, 2014), and copulation behavior is difficult to observe in the wild. However, we can  
321 draw some generalizations. With low levels of promiscuity (2-3 copulations), selection is expected to  
322 be stabilizing, and it is similar across levels of variation in female preference. In contrast, with high  
323 numbers of copulations (10-25), selection on sperm is stabilizing, null, or disruptive, depending on  
324 the level of variation in the female preference.

325 *Low to moderate promiscuity systems.*-For many species, we suspect that the number of  
326 copulation partners is low enough that stabilizing selection is broadly expected. Inferences of  
327 copulation rate from paternity patterns suggest in socially monogamous passerine birds that females  
328 on average copulate with fewer than 3 males (Brommer *et al.*, 2007, 2010; Cramer *et al.*, 2020a).  
329 Genotyping remnants of stored sperm in the female reproductive tract indicates that mean number  
330 of mates is between 2 and 6 for several invertebrates (including butterflies, crickets, and beetles;  
331 Gage, 1994; Simmons *et al.*, 2007; Simmons & Beveridge, 2010; Turnell & Shaw, 2015). In such  
332 species, assuming heritability of sperm morphology (reviewed by Edme *et al.*, 2019), the sperm-  
333 female fit function modeled here would then often be expected to erode variation in sperm  
334 morphology over time. Why, then, are sperm cells still variable, and why does the level of variability  
335 correlate with promiscuity rates?

336 Stabilizing selection imposed by the need to fit the female's sperm storage organs may be  
337 countered by diverse other selective pressures. For example, different sperm morphology may  
338 confer a fertilization advantage depending on whether the sperm are the first-inseminated (ie., in a  
339 defensive position relative to competitors) or are later-inseminated (in an offensive role) (Clark *et al.*,  
340 1995; Calhim *et al.*, 2011). The most advantageous sperm morphology may also depend on the  
341 phenotype of the male himself (Ålund *et al.*, 2018). Sperm morphology may correlate with other  
342 ejaculate traits that are also under selection, such as sperm number and sperm swimming speed,  
343 resulting in complex multivariate selection patterns (Snook, 2005; Fitzpatrick *et al.*, 2012; Lüpold *et*



344 *al.*, 2012b). Sperm morphology may correlate with pre-copulatory traits under selection (e.g.  
345 Simmons *et al.*, 2017), creating indirect selection on sperm morphology (Cramer, 2021). Finally,  
346 selection for genetically compatible sperm (Simmons *et al.*, 2006; Fossøy *et al.*, 2008; Bretman *et al.*,  
347 2009; Gasparini & Pilastro, 2011; Rekdal *et al.*, 2019) is expected to be independent of sperm  
348 morphology, since it depends on the genotypes of the male and female. As these examples show, it is  
349 most appropriate to consider the sperm-sperm storage organ fit as one component of a complex  
350 selective landscape.

351         At an ontogenetic level, variation in sperm morphology may arise due to various  
352 environmental factors, including but not limited to age (e.g., Cramer *et al.*, 2020b), seasonal changes  
353 in sperm morphology (Lüpold *et al.*, 2012a; Cramer *et al.*, 2013; Edme *et al.*, 2019), larval rearing  
354 conditions and timing (Vermeulen *et al.*, 2009), differences in the social environment as an adult  
355 (Immler *et al.*, 2010; Rojas Mora *et al.*, 2018), and condition-dependence of sperm phenotypes  
356 (which has been documented in some studies but is not generally expected; Macartney *et al.*, 2019).

357         Persistence of variation in sperm morphology may also depend on the genetic and genomic  
358 underpinnings of the trait. In zebra finches, for example, a genomic inversion on the sex  
359 chromosome allows many loci to act as a super gene influencing sperm morphology (Kim *et al.*,  
360 2017), and this supergene shows heterozygote advantage that could sustain genetic variation over  
361 time (Knief *et al.*, 2017). Maternal genetic effects on sperm traits have been found in several studies  
362 (e.g., Ward, 2000; Morrow & Gage, 2001; Froman *et al.*, 2002). If the genes causing these maternal  
363 effects are X-linked or on the mitochondria, they may be protected to some extent from selection  
364 acting on the sperm phenotype (Gemmell *et al.*, 2004). Genetic underpinnings of sperm morphology  
365 are poorly known for most species, although substantial heritability of sperm morphology indicates  
366 strong genetic effects (reviewed in Edme *et al.*, 2019). However, heritability is less directly relevant to  
367 how quickly a trait is expected to evolve in response to selection than is evolvability (Hansen *et al.*,  
368 2011). Evolvability for sperm morphological traits is comparable to values for other linear trait

369 measurements (median 0.1% for linear traits in Hansen *et al.*, 2011; range for total sperm length  
370 0.02% - 0.26% in Edme *et al.*, 2019, recalculated from  $CV_A$  to  $I_A$  for comparability to Hansen *et al.*,  
371 2011).

372         The above examples may help to explain why sperm remain variable despite stabilizing  
373 selection, but they do not immediately explain the among-species correlation between promiscuity  
374 level and intraspecific sperm morphological variation. Here, at least for social monogamy with extra-  
375 pair paternity, we argue that the among-species pattern is likely driven by the proportion of non-  
376 promiscuous females in the population. Most socially monogamous species with extra-pair paternity  
377 probably include some females that copulate only with their social mate, for example due to  
378 successful mate-guarding by that male (e.g., Chuang-Dobbs *et al.*, 2001; Brylawski & Whittingham,  
379 2004; Johnsen *et al.*, 2008). When a female copulates with only one male and his sperm fertilize all  
380 her eggs, she exerts no selection on his sperm morphology. If social mates also copulate much more  
381 frequently than extra-pair mates, such that the social male has many more sperm in competition  
382 with extra-pair males, selection in the morphology of the social male's sperm may also be weakened.  
383 If we assume that monogamous females exert no selection on sperm and females copulating with 2-  
384 3 males exert stabilizing selection (as indicated in the model), then the total strength of stabilizing  
385 selection should depend on the proportion of monogamous versus promiscuous females. Assuming  
386 that the proportion of monogamous females is lower, or that social males contribute a smaller  
387 proportion of sperm, in species with higher extra-pair paternity rates, we then can expect stronger  
388 overall stabilizing selection on sperm in those species. Strong stabilizing selection due to high  
389 proportions of females obtaining 2-3 copulation partners may result in faster evolution of sperm in  
390 these lineages (as seen in Rowe *et al.*, 2015), if mean preferences become different from mean  
391 sperm traits, for example due to genetic drift.

392         *High promiscuity systems.*- For some groups, for example some eusocial insects, the number  
393 of copulation partners can be quite high (Tarpay *et al.*, 2004). Here, we expect the shape of selection

394 to depend strongly on the degree of variation in female preference, ranging from stabilizing to  
395 disruptive selection. Assuming similar levels of variation in female preference within these taxa,  
396 increases in the number of mating partners from an already-high baseline may not result in strong  
397 increases in selection strength, due to asymptotic effects. Perhaps in contrast to these expectations,  
398 Fitzpatrick & Baer (2011) found a between-species correlation between intraspecific variation in  
399 sperm morphology and promiscuity level in eusocial insects, even when excluding monogamous  
400 species. However, only five species in one genus (*Apis*) had more than 10 copulation partners in their  
401 dataset, limiting the power to test whether promiscuity level correlates with sperm morphological  
402 variation only within highly promiscuous species. Our simulation results suggest that selection on  
403 sperm will be highly dependent on the degree of variation in the female sperm storage organs in  
404 such taxa, although the myriad other factors influencing sperm variation discussed above may also  
405 be at play in high-promiscuity systems. The combination of high promiscuity and high variation in  
406 female sperm storage organs creates an expectation of disruptive sexual selection, which in turn can  
407 play a role in the splitting of lineages to form separate species (Lande, 1981; van Doorn & Weissing,  
408 2002; Weissing *et al.*, 2011; see also Van Doorn *et al.*, 2001; Howard *et al.*, 2009).

#### 409 *Implications for previous work on mate choice*

410 Our observation that limited mate sampling causes stabilizing selection even with substantial  
411 among-female preference variation has important implications for interpreting previous models of  
412 sympatric speciation. Previous models have highlighted a broad female preference distribution as a  
413 key element in generating disruptive selection on male traits as one step that can lead to sympatric  
414 speciation (Higashi *et al.*, 1999; Van Doorn *et al.*, 2001; van Doorn & Weissing, 2002; Weissing *et al.*,  
415 2011). Our results suggest that disruptive selection will occur under more limited circumstances than  
416 was previously appreciated, as females generally are expected to be somewhat limited in the number  
417 of males they can sample (Jennions & Petrie, 1997). We thus support Servedio & Boughman (2017)'s  
418 assertion that novel insights may be obtained in the sympatric speciation literature by further

419 exploring closed-ended preference functions and limited female searches, similar to what we have  
420 simulated here.

421 As expected from previous models (Janetos, 1980; Gomulkiewicz, 1991; Muniz & Machado,  
422 2018), increasing the number of partners generally increased the strength of selection, and the  
423 relationships was asymptotic, with the asymptote reached at a lower value in the conditions with  
424 stabilizing selection than the conditions with disruptive selection. We further find that selection is  
425 generally weaker when paternity is shared within each batch of offspring, compared to when the  
426 best-fit male sires all offspring (Table S2). Models of mate choice should therefore use realistic values  
427 for number of males sampled and number of males succeeding (in copulating or fertilizing) to obtain  
428 the most biologically relevant results.

429 *Conclusions.*- Despite broad interest in sperm morphology, relatively few studies have  
430 evaluated selection on sperm morphology in the wild (Lüpold & Pitnick, 2018), and even fewer have  
431 evaluated the presence and effect of variation in female sperm storage organs. Under our model  
432 where the sperm storage organs bias paternity success towards sperm of a similar size, the level of  
433 variation in the female sperm storage organs determines whether selection on sperm is stabilizing or  
434 disruptive for highly promiscuous species, whereas selection is stabilizing for species with only 2-3  
435 copulations per female.

#### 436 **Literature cited**

437 Ah-King, M., Barron, A.B. & Herberstein, M.E. 2014. Genital evolution: Why are females still  
438 understudied? *PLoS Biol.* **12**: 1–7.

439 Ålund, M., Schmitterlów, S.P., McFarlane, S.E. & Qvarnström, A. 2018. Optimal sperm length for high  
440 siring success depends on forehead patch size in collared flycatchers. *Behav. Ecol.* **29**: 1436–  
441 1443.

442 Amitin, E.G. & Pitnick, S. 2007. Influence of developmental environment on male- and female-

- 443 mediated sperm precedence in *Drosophila melanogaster*. *J. Evol. Biol.* **20**: 381–391.
- 444 Berger, D., Bauerfeind, S.S., Blanckenhorn, W.U. & Schäfer, M.A. 2011. High temperatures reveal  
445 cryptic genetic variation in a polymorphic female sperm storage organ. *Evolution.* **65**: 2830–  
446 2842.
- 447 Birkhead, T.R., Chaline, N., Biggins, J.D., Burke, T. & Pizzari, T. 2004. Nontransitivity of paternity in a  
448 bird. *Evolution.* **58**: 416–420.
- 449 Bjork, A., Starmer, W.T., Higginson, D.M., Rhodes, C.J. & Pitnick, S. 2007. Complex interactions with  
450 females and rival males limit the evolution of sperm offence and defence. *Proc. R. Soc. B Biol.*  
451 *Sci.* **274**: 1779–1788.
- 452 Bretman, A., Newcombe, D. & Tregenza, T. 2009. Promiscuous females avoid inbreeding by  
453 controlling sperm storage. *Mol. Ecol.* **18**: 3340–3345.
- 454 Briskie, J. V. & Montgomerie, R. 1992. Sperm size and sperm competition in birds. *Proc. R. Soc. B Biol.*  
455 *Sci.* **247**: 89–95.
- 456 Briskie, J. V. 1996. Spatiotemporal of sperm storage and last-male patterns in birds sperm  
457 precedence. *Funct. Ecol.* **10**: 375–383.
- 458 Brommer, J.E., Alho, J.S., Biard, C., Chapman, J.R., Charmantier, A., Dreiss, A., *et al.* 2010. Passerine  
459 extrapair mating dynamics: A Bayesian modeling approach comparing four species. *Am. Nat.*  
460 **176**: 178–187.
- 461 Brommer, J.E., Korsten, P., Bouwman, K.M., Berg, M.L. & Komdeur, J. 2007. Is extrapair mating  
462 random? On the probability distribution of extrapair young in avian broods. *Behav. Ecol.* **18**:  
463 895–904.
- 464 Brouwer, L. & Griffith, S.C. 2019. Extra-pair paternity in birds. *Mol. Ecol.* **28**: 4864–4882.
- 465 Brylawski, A.M.Z. & Whittingham, L.A. 2004. An experimental study of mate guarding and paternity

- 466 in house wrens. *Anim. Behav.* **68**: 1417–1424.
- 467 Calhim, S., Double, M.C., Margraf, N., Birkhead, T.R. & Cockburn, A. 2011. Maintenance of sperm  
468 variation in a highly promiscuous wild bird. *PLoS One* **6**: e28809.
- 469 Calhim, S., Immler, S. & Birkhead, T.R. 2007. Postcopulatory sexual selection is associated with  
470 reduced variation in sperm morphology. *PLoS One* **2**: e413.
- 471 Chuang-Dobbs, H.C., Webster, M.S. & Holmes, R.T. 2001. The effectiveness of mate guarding by male  
472 black-throated blue warblers. *Behav. Ecol.* **12**: 541–546.
- 473 Clark, A.G. 2002. Sperm competition and the maintenance of polymorphism. *Heredity.* **88**: 148–153.
- 474 Clark, A.G., Aguade, M., Prout, T., Harshman, L.G. & Langley, C.H. 1995. Variation in sperm  
475 displacement and its association with accessory gland protein loci in *Drosophila melanogaster*.  
476 *Genetics* **139**: 189–201.
- 477 Cramer, E.R.A. 2021. Measuring pre- and post-copulatory sexual selection and their interaction in  
478 socially monogamous species with extra-pair paternity. *Cells* **10**: 620.
- 479 Cramer, E.R.A., Kaiser, S.A., Webster, M.S. & Ryder, T.B. 2020a. Common field data limitations can  
480 substantially bias sexual selection metrics. *Am. Nat.* **196**: 180–196.
- 481 Cramer, E.R.A., Krauss, N., Rowlison, T. & Comizzoli, P. 2020b. Sperm morphology and male age in  
482 black-throated blue warblers, an ecological model system. *Animals* **10**: 1175.
- 483 Cramer, E.R.A., Laskemoen, T., Eroukmanoff, F., Haas, F., Hermansen, J.S., Lifjeld, J.T., *et al.* 2014.  
484 Testing a post-copulatory pre-zygotic reproductive barrier in a passerine species pair. *Behav.*  
485 *Ecol. Sociobiol.* **68**: 1133–1144.
- 486 Cramer, E.R.A., Laskemoen, T., Kleven, O. & Lifjeld, J.T. 2013. Sperm length variation in house wrens  
487 *Troglodytes aedon*. *J. Ornithol.* **154**: 129–138.
- 488 Cramer, E.R.A., Stensrud, E., Marthinsen, G., Hogner, S., Johannessen, L.E., Laskemoen, T., *et al.* 2016.

- 489 Sperm performance in conspecific and heterospecific female fluid. *Ecol. Evol.* **6**: 1363–1377.
- 490 den Boer, S.P.A., Baer, B. & Boomsma, J.J. 2010. Seminal fluid mediates ejaculate competition in  
491 social insects. *Science*. **327**: 1506–1509.
- 492 Dieckmann, U. & Doebeli, M. 1999. On the origin of species by sympatric speciation. *Nature* **400**:  
493 354–357.
- 494 Dougherty, L.R. & Shuker, D.M. 2015. The effect of experimental design on the measurement of mate  
495 choice: A meta-analysis. *Behav. Ecol.* **26**: 311–319.
- 496 Dybas, L.K. & Dybas, H.S. 1981. Coadaptation and taxonomic differentiation of sperm and  
497 spermathecae in featherwing beetles. *Evolution*. **35**: 168–174.
- 498 Eady, P.E. & Brown, D. V. 2017. Male–female interactions drive the (Un)repeatability of copula  
499 duration in an insect. *R. Soc. Open Sci.* **4**: 1–7.
- 500 Eberhard, W. 1996. *Female Control: Sexual Selection by Cryptic Female Choice*. Princeton University  
501 Press, Princeton, NJ.
- 502 Edme, A., Zobač, P., Korsten, P., Albrecht, T., Schmoll, T. & Krist, M. 2019. Moderate heritability and  
503 low evolvability of sperm morphology in a species with high risk of sperm competition, the  
504 collared flycatcher *Ficedula albicollis*. *J. Evol. Biol.* **32**: 205–217.
- 505 Farrow, R.A., Deeming, D.C. & Eady, P.E. 2022. Male and female developmental temperature  
506 modulate post-copulatory interactions in a beetle. *J. Therm. Biol.* **103**: 103155.
- 507 Fitzpatrick, J.L. & Baer, B. 2011. Polyandry reduces sperm length variation in social insects. *Evolution*  
508 **65**: 3006–3012.
- 509 Fitzpatrick, J.L., Simmons, L.W. & Evans, J.P. 2012. Complex patterns of multivariate selection on the  
510 ejaculate of a broadcast spawning marine invertebrate. *Evolution*. **66**: 2451–2460.
- 511 Fossøy, F., Johnsen, A. & Lifjeld, J.T. 2008. Multiple genetic benefits of female promiscuity in a

- 512 socially monogamous passerine. *Evolution*. **62**: 145–156.
- 513 Froman, D.P., Pizzari, T., Feltmann, A.J., Castillo-Juarez, H. & Birkhead, T.R. 2002. Sperm mobility:  
514 mechanisms of fertilizing efficiency, genetic variation and phenotypic relationship with male  
515 status in the domestic fowl, *Gallus gallus domesticus*. *Proc. Biol. Sci.* **269**: 607–12.
- 516 Gage, M.J.G. 1994. Associations between body size, mating pattern, testis size and sperm lengths  
517 across butterflies. *Proc. R. Soc. London B* **258**: 247–254.
- 518 García-González, F. & Simmons, L.W. 2007. Shorter sperm confer higher competitive fertilization  
519 success. *Evolution*. **61**: 816–24.
- 520 Gasparini, C. & Pilastro, A. 2011. Cryptic female preference for genetically unrelated males is  
521 mediated by ovarian fluid in the guppy. *Proc. R. Soc. B Biol. Sci.* **278**: 2495–501.
- 522 Gemmell, N.J., Metcalf, V.J. & Allendorf, F.W. 2004. Mother's curse: The effect of mtDNA on  
523 individual fitness and population viability. *Trends Ecol. Evol.* **19**: 238–244.
- 524 Gomulkiewicz, R. 1991. Limited female choice and the evolution of secondary sexual characters. *Am.*  
525 *Nat.* **138**: 1396–1407.
- 526 Hansen, T.F., Pélabon, C. & Houle, D. 2011. Heritability is not evolvability. *Evol. Biol.* **38**: 258–277.
- 527 Hellriegel, B. & Bernasconi, G. 2000. Female-mediated differential sperm storage in a fly with  
528 complex spermathecae, *Scatophaga stercoraria*. *Anim. Behav.* **59**: 311–317.
- 529 Hemmings, N., Bennison, C. & Birkhead, T.R. 2016. Intra-ejaculate sperm selection in female zebra  
530 finches. *Biol. Lett.* **12**: 4–7.
- 531 Hemmings, N. & Birkhead, T. 2017. Differential sperm storage by female zebra finches *Taeniopygia*  
532 *guttata*. *Proc. R. Soc. B Biol. Sci.* **284**.
- 533 Higashi, M., Takimoto, G. & Yamamura, N. 1999. Sympatric speciation by sexual selection. *Nature*  
534 **402**: 523–526.



- 535 Higginson, D.M., Miller, K.B., Segraves, K.A. & Pitnick, S. 2012. Female reproductive tract form drives  
536 the evolution of complex sperm morphology. *Proc. Natl. Acad. Sci. U. S. A.* **109**: 4538–4543.
- 537 Hosken, D.J., Garner, T.W.J. & Ward, P.I. 2001. Sexual conflict selects for male and female  
538 reproductive characters. *Curr. Biol.* **11**: 489–493.
- 539 Howard, D.J., Palumbi, S.R., Birge, L.M. & Manier, M.K. 2009. Sperm and speciation. In: *Sperm*  
540 *Biology: An Evolutionary Perspective* (T. R. Birkhead, D. J. Hosken, & S. Pitnick, eds), pp. 367–  
541 404. Academic Press, Amsterdam.
- 542 Immler, S., Pryke, S.R., Birkhead, T.R. & Griffith, S.C. 2010. Pronounced within-individual plasticity in  
543 sperm morphometry across social environments. *Evolution.* **64**: 1634–43.
- 544 Janetos, A.C. 1980. Strategies of female mate choice: A theoretical analysis. *Behav. Ecol. Sociobiol.* **7**:  
545 107–112.
- 546 Jennions, M.D. & Petrie, M. 1997. Variation in mate choice and mating preferences: A review of  
547 causes and consequences. *Biol. Rev.* **72**: 283–327.
- 548 Jennions, M.D. & Petrie, M. 2000. Why do females mate multiply? A review of the genetic benefits.  
549 *Biol. Rev.* **75**: 21–64.
- 550 Johnsen, A., Pärn, H., Fossøy, F., Kleven, O., Laskemoen, T. & Lifjeld, J.T. 2008. Is female promiscuity  
551 constrained by the presence of her social mate? An experiment with bluethroats *Luscinia*  
552 *svecica*. *Behav. Ecol. Sociobiol.* **62**: 1761–1767.
- 553 Kahrl, A.F., Kustra, M.C., Reedy, A.M., Bhave, R.S., Sears, H.A., Warner, D.A., *et al.* 2021a. Selection  
554 on sperm count, but not on sperm morphology or velocity, in a wild population of anolis lizards.  
555 *Cells* **10**: 1–13.
- 556 Kahrl, A.F., Snook, R.R. & Fitzpatrick, J.L. 2021b. Fertilization mode drives sperm length evolution  
557 across the animal tree of life. *Nat. Ecol. Evol.* **5**: 1153–1164.

- 558 Kim, K.W., Bennison, C., Hemmings, N., Brookes, L., Hurley, L.L., Griffith, S.C., *et al.* 2017. A sex-linked  
559 supergene controls sperm morphology and swimming speed in a songbird. *Nat. Ecol. Evol.* **1**:  
560 1168–1176.
- 561 Knief, U., Forstmeier, W., Pei, Y., Ihle, M., Wang, D., Martin, K., *et al.* 2017. A sex-chromosome  
562 inversion causes strong overdominance for sperm traits that affect siring success. *Nat. Ecol.*  
563 *Evol.* **1**: 1177–1184.
- 564 Lande, R. 1981. Models of speciation by sexual selection on polygenic traits. *Proc. Natl. Acad. Sci. U.*  
565 *S. A.* **78**: 3721–3725.
- 566 Lande, R. & Arnold, S.J. 1983. The measurement of selection on correlated characters. *Evolution.* **37**:  
567 1210–1226.
- 568 Lifjeld, J.T., Laskemoen, T., Kleven, O., Albrecht, T. & Robertson, R.J. 2010. Sperm length variation as  
569 a predictor of extrapair paternity in passerine birds. *PLoS One* **5**: e13456.
- 570 Løvlie, H., Gillingham, M.A.F., Worley, K., Pizzari, T. & Richardson, D.S. 2013. Cryptic female choice  
571 favours sperm from major histocompatibility complex-dissimilar males. *Proc. R. Soc. B* **280**:  
572 20131296.
- 573 Lüdecke, D. 2021. sjstats: Statistical Functions for Regression Models (Version 0.18.1).
- 574 Lüpold, S., Birkhead, T.R. & Westneat, D.F. 2012a. Seasonal variation in ejaculate traits of male red-  
575 winged blackbirds (*Agelaius phoeniceus*). *Behav. Ecol. Sociobiol.* **66**: 1607–1617.
- 576 Lüpold, S., Manier, M.K., Berben, K.S., Smith, K.J., Daley, B.D., Buckley, S.H., *et al.* 2012b. How  
577 multivariate ejaculate traits determine competitive fertilization success in *Drosophila*  
578 *melanogaster*. *Curr. Biol.* **22**: 1667–72.
- 579 Lüpold, S. & Pitnick, S. 2018. Sperm form and function: what do we know about the role of sexual  
580 selection? *Reproduction* **155**: R229–R243.

- 581 Lüpold, S., Pitnick, S., Berben, K.S., Blengini, C.S., Belote, J.M. & Manier, M.K. 2013. Female mediation  
582 of competitive fertilization success in *Drosophila melanogaster*. *Proc. Natl. Acad. Sci. U. S. A.*  
583 **110**: 10693–10698.
- 584 Macartney, E.L., Crean, A.J., Nakagawa, S. & Bonduriansky, R. 2019. Effects of nutrient limitation on  
585 sperm and seminal fluid: a systematic review and meta-analysis. *Biol. Rev.* **94**: 1722–1739.
- 586 Manier, M.K., Belote, J.M., Berben, K.S., Novikov, D., Stuart, W.T. & Pitnick, S. 2010. Resolving  
587 mechanisms of competitive fertilization success in *Drosophila melanogaster*. *Science*. **328**: 354–  
588 357.
- 589 Mendonca, T., Cadby, A.J. & Hemmings, N. 2019. Sperm gatekeeping: 3D Imaging reveals a  
590 constricted entrance to zebra finch sperm storage tubules. *Biophys. J.* **117**: 2180–2187.
- 591 Millan, C.H., Machado, G. & Muniz, D.G. 2020. Within-population variation in female mating  
592 preference affects the opportunity for sexual selection and the evolution of male traits, but  
593 things are not as simple as expected. *J. Evol. Biol.* **33**: 1579–1592.
- 594 Miller, G.T. & Pitnick, S. 2002. Sperm-female coevolution in *Drosophila*. *Science*. **298**: 1230–1233.
- 595 Morrow, E.H. & Gage, M.J.G. 2001. Artificial selection and heritability of sperm length in *Gryllus*  
596 *bimaculatus*. *Heredity*. **87**: 356–362.
- 597 Muniz, D.G. & Machado, G. 2018. Mate sampling influences the intensity of sexual selection and the  
598 evolution of costly sexual ornaments. *J. Theor. Biol.* **447**: 74–83.
- 599 Parker, G. 1970. Sperm competition and its evolutionary consequences in the insects. *Biol Rev* **45**:  
600 525–567.
- 601 Pitnick, S., Hosken, D.J. & Birkhead, T.R. 2009. Sperm morphological diversity. In: *Sperm Biology: An*  
602 *Evolutionary Perspective*, pp. 69–150. Academic Press, Amsterdam.
- 603 Reinhart, M., Carney, T., Clark, A.G., Fiumera, A.C. & Markow, T. 2015. Characterizing male-female

- 604 interactions using natural genetic variation in *Drosophila melanogaster*. *J. Hered.* **106**: 67–79.
- 605 Rekdal, S.L., Anmarkrud, J.A., Lifjeld, J.T. & Johnsen, A. 2019. Extra-pair mating in a passerine bird  
606 with highly duplicated major histocompatibility complex class II: Preference for the golden  
607 mean. *Mol. Ecol.* **28**: 5133–5144.
- 608 Richardson, J.T.E. 2011. Eta squared and partial eta squared as measures of effect size in educational  
609 research. *Educ. Res. Rev.* **6**: 135–147.
- 610 Rojas Mora, A., Meniri, M., Ciprietti, S. & Helfenstein, F. 2018. Is sperm morphology functionally  
611 related to sperm swimming ability? A case study in a wild passerine bird with male hierarchies.  
612 *BMC Evol. Biol.* **18**: 1–11.
- 613 Rowe, M., Albrecht, T., Cramer, E.R.A., Johnsen, A., Laskemoen, T., Weir, J.T., *et al.* 2015.  
614 Postcopulatory sexual selection is associated with accelerated evolution of sperm morphology.  
615 *Evolution.* **69**: 1044–1052.
- 616 Rowley, A., Locatello, L., Kahrl, A., Rego, M., Boussard, A., Garza-Gisholt, E., *et al.* 2019. Sexual  
617 selection and the evolution of sperm morphology in sharks. *J. Evol. Biol.* **32**: 1027–1035.
- 618 Servedio, M.R. & Boughman, J.W. 2017. The role of sexual selection in local adaptation and  
619 speciation. *Annu. Rev. Ecol. Evol. Syst.* **48**: 85–109.
- 620 Simmons, L.W. & Beveridge, M. 2010. The strength of postcopulatory sexual selection within natural  
621 populations of field crickets. *Behav. Ecol.* **21**: 1179–1185.
- 622 Simmons, L.W., Beveridge, M. & Kennington, W.J. 2007. Polyandry in the wild: Temporal changes in  
623 female mating frequency and sperm competition intensity in natural populations of the  
624 tettigoniid *Requena verticalis*. *Mol. Ecol.* **16**: 4613–4623.
- 625 Simmons, L.W., Beveridge, M., Wedell, N. & Tregenza, T. 2006. Postcopulatory inbreeding avoidance  
626 by female crickets only revealed by molecular markers. *Mol. Ecol.* **15**: 3817–3824.

- 627 Simmons, L.W., Lovegrove, M. & Almbro, M. 2014. Female effects, but no intrinsic male effects on  
628 paternity outcome in crickets. *J. Evol. Biol.* **27**: 1644–1649.
- 629 Simmons, L.W., Lüpold, S. & Fitzpatrick, J.L. 2017. Evolutionary trade-off between secondary sexual  
630 traits and ejaculates. *Trends Ecol. Evol.* **32**: 964–976.
- 631 Snook, R.R. 2005. Sperm in competition: not playing by the numbers. *Trends Ecol. Evol.* **20**: 46–53.
- 632 Tarpy, D.R., Nielsen, R. & Nielsen, D.I. 2004. A scientific note on the revised estimates of effective  
633 paternity frequency in *Apis*. *Insectes Soc.* **51**: 203–204.
- 634 Turnell, B.R. & Shaw, K.L. 2015. Polyandry and postcopulatory sexual selection in a wild population.  
635 *Mol. Ecol.* **24**: 6278–6288.
- 636 Urbach, D., Folstad, I. & Rudolfson, G. 2005. Effects of ovarian fluid on sperm velocity in Arctic charr  
637 (*Salvelinus alpinus*). *Behav. Ecol. Sociobiol.* **57**: 438–444.
- 638 Van Doorn, G.S., Luttikhuisen, P.C. & Weissing, F.J. 2001. Sexual selection at the protein level drives  
639 the extraordinary divergence of sex-related genes during sympatric speciation. *Proc. R. Soc. B*  
640 *Biol. Sci.* **268**: 2155–2161.
- 641 van Doorn, G.S. & Weissing, F.J. 2002. Ecological versus sexual selection models of sympatric  
642 speciation: A synthesis. *Selection* **2**: 17–40.
- 643 Varea-Sánchez, M., Montoto, L.G., Tourmente, M. & Roldan, E.R.S. 2014. Postcopulatory sexual  
644 selection results in spermatozoa with more uniform head and flagellum sizes in rodents. *PLoS*  
645 *One* **9**: e108148.
- 646 Vermeulen, A., Engels, S., Engqvist, L. & Sauer, K.P. 2009. Phenotypic plasticity in sperm traits in  
647 scorpionflies (Mecoptera: Panorpididae): Consequences of larval history and seasonality on  
648 sperm length and sperm transfer. *Eur. J. Entomol.* **106**: 347–352.
- 649 Ward, P.I. 2000. Sperm length is heritable and sex-linked in the yellow dung fly (*Scathophaga*

650 *stercoraria*). *J. Zool.* **251**: 349–353.

651 Weissing, F.J., Edelaar, P. & van Doorn, G.S. 2011. Adaptive speciation theory: A conceptual review.

652 *Behav. Ecol. Sociobiol.* **65**: 461–480.

653 White, J.W., Rassweiler, A., Samhouri, J.F., Stier, A.C. & White, C. 2014. Ecologists should not use

654 statistical significance tests to interpret simulation model results. *Oikos* **123**: 385–388.

655 Wickham, H., Averick, M., Bryan, J., Chang, W., McGowan, L.D., François, R., *et al.* 2019. Welcome to

656 the tidyverse. *J. Open Source Softw.* **4**: 1686.

657 Wilson, N., Tubman, S.C., Eady, P.E. & Robertson, G.W. 1997. Female genotype affects male success

658 in sperm competition. *Proc. R. Soc. B Biol. Sci.* **264**: 1491–1495.

659

660
